# Supplementary material for: Species identification by experts and non-experts: comparing images from field guides
Source: PubMed Central journal article supplement (PMC5028888; doi:10.1038/srep33634), 2016-09-20
Supplement: srep33634-s1.pdf [file srep33634-s1.pdf]

1 **Species identification by experts and non-experts: comparing images from field guides**

2 **Supplementary material**

3

4 \*G. E. Austen<sup>1</sup> (gea7@kent.ac.uk), M. Bindemann<sup>2</sup>, R. A. Griffiths<sup>1</sup>, D. L. Roberts<sup>1</sup>

5 <sup>1</sup>Durrell Institute of Conservation and Ecology, School of Anthropology and Conservation,

6 Marlowe Building, University of Kent, Canterbury CT2 7NR, UK

7 <sup>2</sup>School of Psychology, Keynes College, University of Kent, Canterbury CT2 7NP, UK

8

9 **Supplementary Table S1.** *Bombus* species and caste, and relevant illustrator for each image, used  
 10 in the survey.

| Image Type      | Species and caste                                  | Species and caste                               | Artist        |                |
|-----------------|----------------------------------------------------|-------------------------------------------------|---------------|----------------|
|                 |                                                    |                                                 | Image on left | Image on right |
| <b>Match</b>    | <i>B. distinguendus</i> (Morawitz 1869)<br>(Queen) |                                                 | C. Shields    | A.J. Hopkins   |
| <b>Match</b>    | <i>B. hortorum</i> (Linnaeus 1761)<br>(Queen)      |                                                 | C. Shields    | A.J. Hopkins   |
| <b>Match</b>    | <i>B. humilis</i> (Illiger 1806)<br>(Queen)        |                                                 | A.J. Hopkins  | C. Shields     |
| <b>Match</b>    | <i>B. jonellus</i> (Kirby 1802)<br>(Queen)         |                                                 | C. Shields    | A.J. Hopkins   |
| <b>Match</b>    | <i>B. pratorum</i> (Linnaeus 1761)<br>(Male)       |                                                 | C. Shields    | A.J. Hopkins   |
| <b>Match</b>    | <i>B. ruderarius</i> (Müller 1765)<br>(Male)       |                                                 | C. Shields    | A.J. Hopkins   |
| <b>Match</b>    | <i>B. ruderarius</i> (Müller 1765)<br>(Queen)      |                                                 | A.J. Hopkins  | C. Shields     |
| <b>Match</b>    | <i>B. soroensis</i> (Fabricius 1777)<br>(Queen)    |                                                 | A.J. Hopkins  | C. Shields     |
| <b>Match</b>    | <i>B. sylvarum</i> (Linnaeus 1761)<br>(Queen)      |                                                 | C. Shields    | A.J. Hopkins   |
| <b>Match</b>    | <i>B. terrestris</i> (Linnaeus 1758)<br>(Queen)    |                                                 | A.J. Hopkins  | C. Shields     |
|                 |                                                    |                                                 |               |                |
| <b>Mismatch</b> | <i>B. hortorum</i> (Linnaeus 1761)<br>(Queen)      | <i>B. ruderatus</i> (Fabricius 1775)<br>(Queen) | C. Shields    | C. Shields     |
| <b>Mismatch</b> | <i>B. lapidarius</i> (Linnaeus 1758)<br>(Male)     | <i>B. ruderarius</i> (Müller 1765)<br>(Male)    | A.J. Hopkins  | A.J. Hopkins   |
| <b>Mismatch</b> | <i>B. lapidarius</i> (Linnaeus 1758)<br>(Queen)    | <i>B. ruderarius</i> (Müller 1765)<br>(Queen)   | C. Shields    | C. Shields     |
| <b>Mismatch</b> | <i>B. lucorum</i> (Linnaeus 1761)<br>(Queen)       | <i>B. terrestris</i> (Linnaeus 1758)<br>(Queen) | A.J. Hopkins  | C. Shields     |
| <b>Mismatch</b> | <i>B. lucorum</i> (Linnaeus 1761)<br>(Queen)       | <i>B. soroensis</i> (Fabricius 1777)<br>(Queen) | C. Shields    | C. Shields     |
| <b>Mismatch</b> | <i>B. monticola</i> (Smith 1849)<br>(Queen)        | <i>B. lapidarius</i> (Linnaeus 1758)<br>(Queen) | A.J. Hopkins  | A.J. Hopkins   |
| <b>Mismatch</b> | <i>B. muscorum</i> (Linnaeus 1758)<br>(Male)       | <i>B. humilis</i> (Illiger 1806)<br>(Male)      | C. Shields    | C. Shields     |
| <b>Mismatch</b> | <i>B. pascuorum</i> (Scopoli 1763)<br>(Male)       | <i>B. muscorum</i> (Linnaeus 1758)<br>(Male)    | C. Shields    | C. Shields     |
| <b>Mismatch</b> | <i>B. pascuorum</i> (Scopoli 1763)<br>(Queen)      | <i>B. sylvarum</i> (Linnaeus 1761)<br>(Queen)   | A.J. Hopkins  | C. Shields     |
| <b>Mismatch</b> | <i>B. subterraneus</i> (Linnaeus 1758)<br>(Queen)  | <i>B. monticola</i> (Smith 1849)<br>(Queen)     | A.J. Hopkins  | C. Shields     |

12 **Supplementary Table S2.** List of UK and Palaearctic species of the genus *Bombus*.

13

|                     |                      |                     |
|---------------------|----------------------|---------------------|
| <i>argillaceus</i>  | <i>hypnorum</i>      | <i>runderarius</i>  |
| <i>armeniacus</i>   | <i>hypocrita</i>     | <i>runderatus</i>   |
| <i>atripes</i>      | <i>jonellus</i>      | <i>rupestris</i>    |
| <i>barbutellus</i>  | <i>ladakhensis</i>   | <i>schrencki</i>    |
| <i>bohemicus</i>    | <i>lapidarius</i>    | <i>soroensis</i>    |
| <i>campestris</i>   | <i>lucorum</i>       | <i>subterraneus</i> |
| <i>cryptarum</i>    | <i>margreiteri</i>   | <i>sylvarum</i>     |
| <i>cullumanus</i>   | <i>monticola</i>     | <i>sylvestris</i>   |
| <i>deuteronymus</i> | <i>morawitzianus</i> | <i>terrestris</i>   |
| <i>fragrans</i>     | <i>muscorum</i>      | <i>tichenkoi</i>    |
| <i>hedini</i>       | <i>opulentus</i>     | <i>ussurensis</i>   |
| <i>hortorum</i>     | <i>pascuorum</i>     | <i>wurflenii</i>    |
| <i>humilis</i>      | <i>perezi</i>        |                     |
| <i>hyperboreus</i>  | <i>persicus</i>      |                     |

14
